# Supplementary material for: SBA-Pr-Is-TAP Functionalized Nanostructured Silica as a Highly Selective Fluorescent Chemosensor for Fe3+ and Cr2O72− Ions in Aqueous Media
Source: MDPI journal article supplement (doi:10.3390/nano11102533), 2021-09-28
Supplement: s1 [file s1]

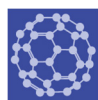

Supporting information

# SBA-Pr-Is-TAP Functionalized Nanostructured Silica as a Highly Selective Fluorescent Chemosensor for $\text{Fe}^{3+}$ and $\text{Cr}_2\text{O}_7^{2-}$ Ions in Aqueous Media

Ghodsii Mohammadi Ziarani <sup>1,\*</sup>, Maryam Akhgar <sup>1</sup>, Fatemeh Mohajer <sup>1</sup>, Alireza Badiei <sup>2</sup> and Rafael Luque <sup>3,\*</sup>

<sup>1</sup> Department of Chemistry, Faculty of Physics and Chemistry, Alzahra University, Tehran 1993893979, Iran; m.akhgar@student.alzahra.ac.ir (M.A.); f.mohajer@alzahra.ac.ir (F.M.)

<sup>2</sup> School of Chemistry, College of Science, University of Tehran, Tehran 1417614411, Iran; abadiei@khayam.ut.ac.ir

<sup>3</sup> Departamento de Química Organica, Campus de Rabanales, Universidad de Cordoba, Edificio Marie Curie, 14014 Córdoba, Spain

\* Correspondence: gmohammadi@alzahra.ac.ir (G.M.Z.); rafael.luque@uco.es (R.L.); Tel./Fax: +98-21-8861-3937 (G.M.Z.)

## Experimental Section

### Materials and Physical Measurements

2,4,6-tri-aminopyrimidine, isatin, (3-chloropropyl)triethoxysilane (Sigma Aldrich), tetraethylorthosilicate (TEOS), triethylamine, potassium carbonate, ethanol, and toluene (Merck). All chemicals and solvents were used without further purification. Low-angle XRD methods were recorded by using a X'Pert Pro MPD using Cu-K $\alpha$  radiation ( $\lambda=1.5405$  Å). Brunauer–Emmett–Teller (BET) procedures were performed by using a Belsorp, mini II Japan. Thermogravimetric analyzes (TGA) were measured by a TGA Q50 V6.3 with a rising rate of 10 °C min<sup>-1</sup> in the air. Scanning electron microscopy (SEM) analysis was recorded on Hitachi S-4160. FT-IR spectra were obtained from the KBr disc using a FT-IR Bruker Tensor 27 tool. Fluorescence diagrams were composed with a Cary Eclipse Fluorescent Spectrophotometer. TEM analysis was recorded from ZEISS company which was made in Germany, EM10C-100 KV model.

### Synthesis of SBA-15

The SBA-15 was prepared based on the previous reports.<sup>1</sup>

### Synthesis of SBA-Pr-Cl

The synthesis process for the functionalization of the SBA-15 with the chloropropyl moiety was prepared according to an informed procedure<sup>2</sup>. 1 g of dried and calcined SBA-15 was dispersed in 50 mL dried toluene with stirring. Then, 5 mmol (3-chloropropyl) triethoxysilane was slowly added to the homogenous solution and was refluxed for 24 h. Lastly, the solid product was filtered, washed with ethanol, and dried at room temperature.

### Synthesis of SBA-Pr-Is

SBA-Pr-Is was obtained according to an informed procedure before<sup>3</sup>. Isatin (5 mmol, 0.73 g) and triethylamine (10 mmol) were added to a suspension of 1 g of the prepared SBA-Pr-Cl in dried toluene. Then the homogenous solution was refluxed for 24 h. the final product was washed several times with dried ethanol and dried at room temperature.

## References

1. Zhao, D.; Feng, J.; Huo, Q.; Melosh, N.; Fredrickson, G.H.; Chmelka, B.F.; Stucky, G.D. *Science*. 1998, 279, 548–552. <https://doi.org/10.1126/science.279.5350.548>
2. Karimi, M.; Badiei, A.; Mohammadi Ziarani, G. *Inorganica Chim. Acta* **2016**, 450, 346–352. <https://doi.org/10.1016/j.ica.2016.06.026>
3. Lashgari, N.; Badiei, A.; Mohammadi Ziarani, G. *J Phys Chem Solids* **2017**, 103, 238–248. <https://doi.org/10.1016/j.jpcs.2016.11.021>
